# Supplementary material for: Construction of Bi2MoO6/CdS heterostructures with enhanced visible light photocatalytic activity for fuel denitrification
Source: Royal Society of Chemistry journal article supplement (doi:10.1039/d0dt03922e), 2020-12-15
Supplement: d0dt03922e1.pdf [file d0dt03922e1.pdf]

## Supplementary information

# Construction of Bi<sub>2</sub>MoO<sub>6</sub>/CdS Heterostructure with Enhanced Visible Light Photocatalytic Activity for Fuel Denitrification

Weineng Hu<sup>1</sup>, Mengmeng Jiang<sup>1</sup>, Ruowen Liang<sup>2,3</sup>, Renkun Huang<sup>2,3</sup>,  
Yuzhou Xia<sup>2,3</sup>, Zhiyu Liang<sup>2,3</sup> and Guiyang Yan<sup>2,3,\*</sup>

<sup>1</sup> State Key Laboratory of Photocatalysis on Energy and Environment, Fuzhou University, Fuzhou 350002, P. R. China

<sup>2</sup> Department of chemistry, Fujian province university key laboratory of green energy and environment catalysis, Ningde Normal University, Ningde 352100, P. R. China

<sup>3</sup> Department of chemistry, Fujian Provincial Key Laboratory of Featured Materials in Biochemical Industry, Ningde Normal University, Ningde 352100, Fujian, China

\* Corresponding author: Prof. Guiyang Yan, E-mail: ygyfjnu@163.com

## Experimental section

### 1、Details of characterization

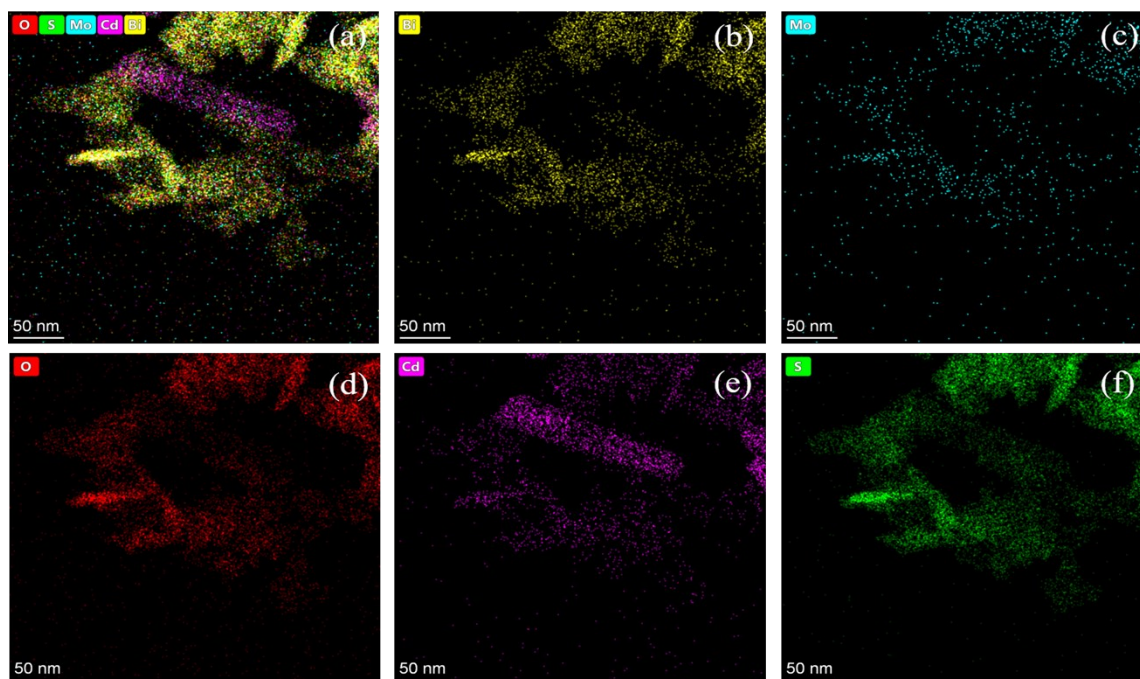

Fig. S1. (a-f) HAADF-STEM mapping images of the 0.65-BMO/CdS

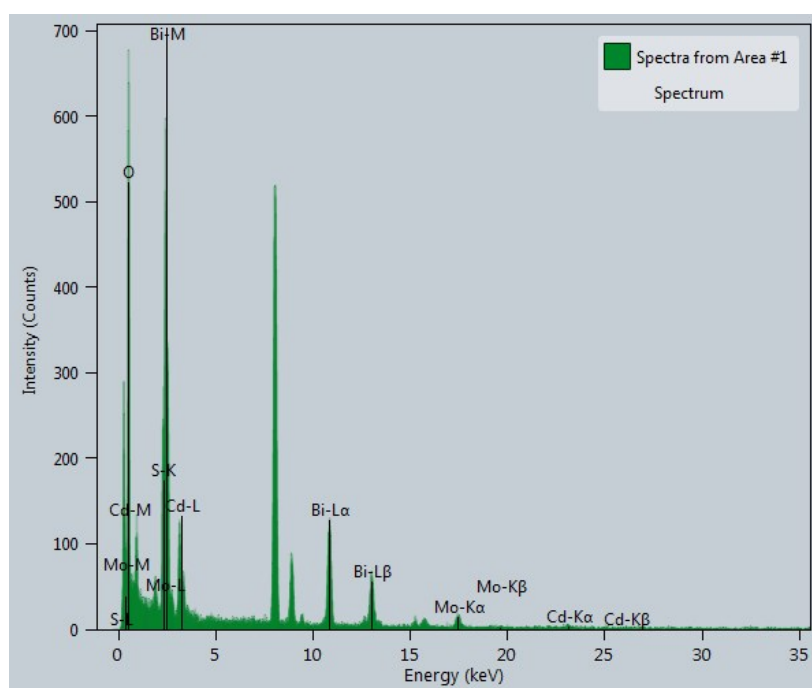

Fig. S2. EDS of the 0.65-BMO/CdS

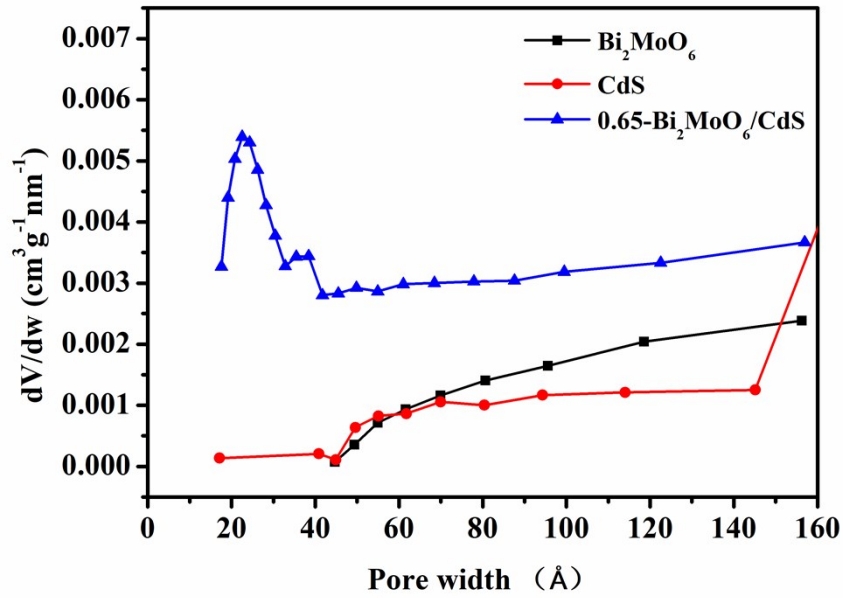

Fig. S3. pore size distribution curves of photocatalysts

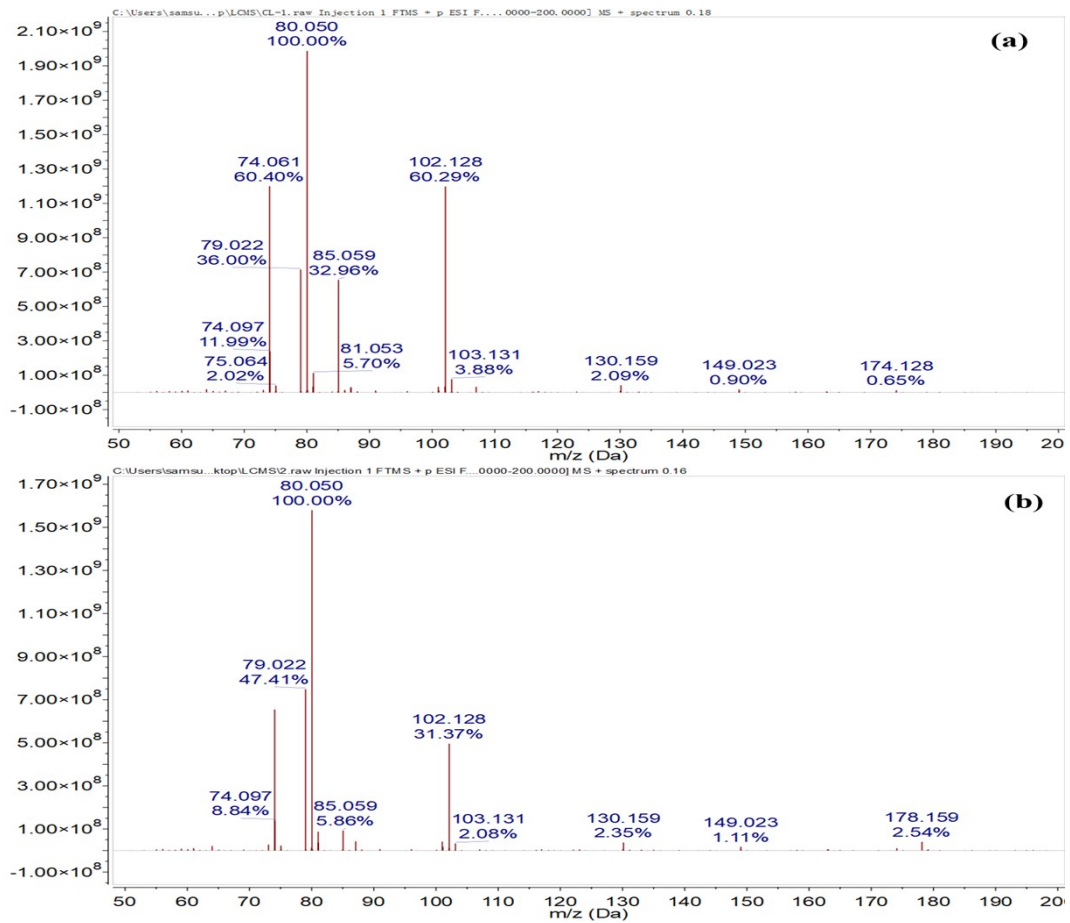

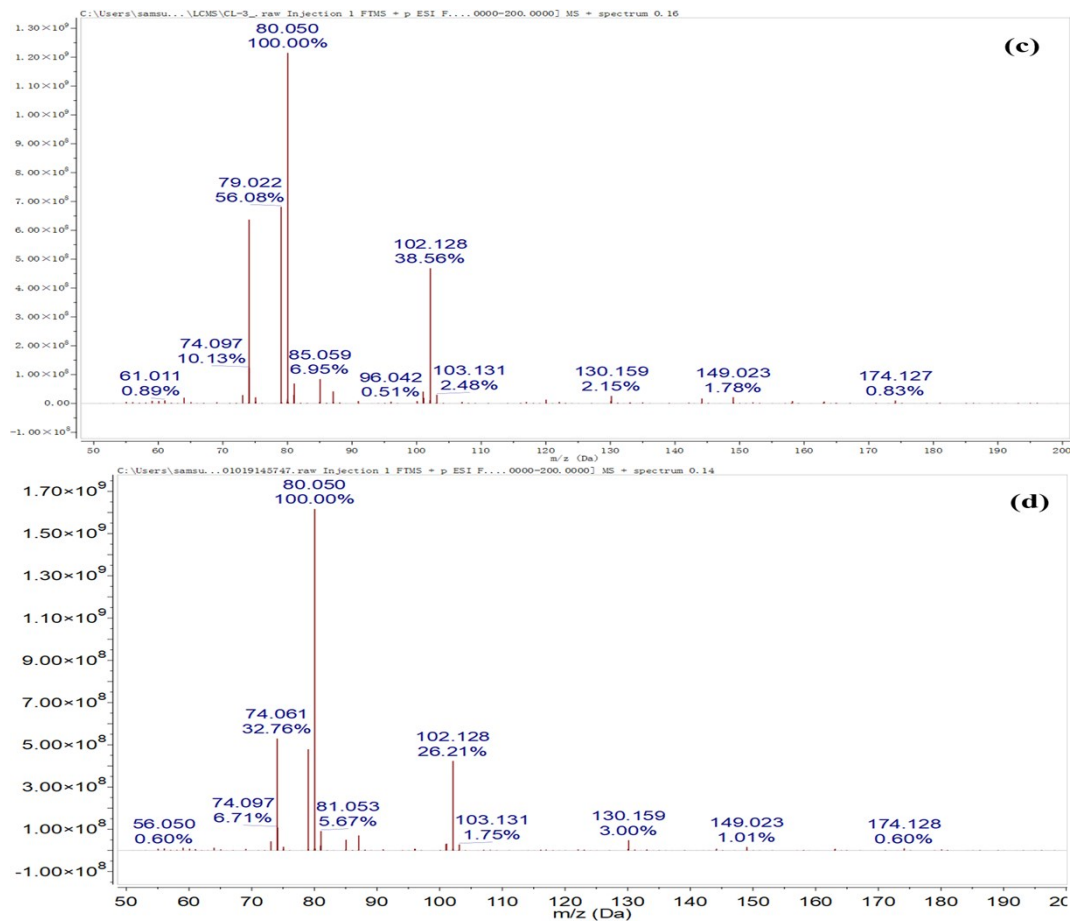

**Fig. S4. High-performance liquid chromatography profiles of pyridine after different irradiation times: (a) 1h, (b) 2h, (c) 3h and (d) 4h**

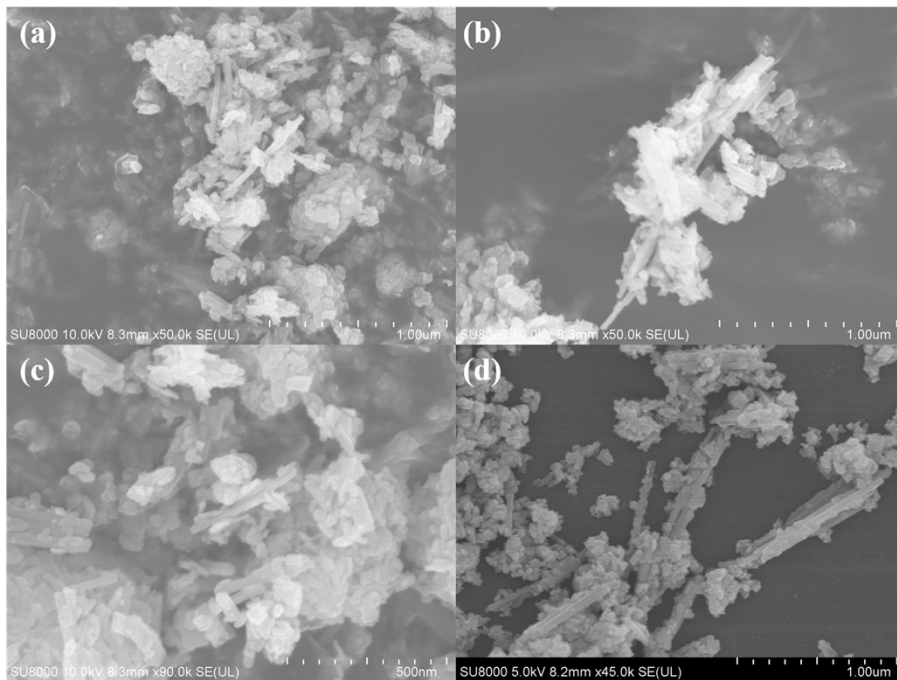

**Fig. S5. SEM images of (a,b,c) 0.65-BMO/CdS after four cycles, (d) Initial 0.65-BMO/CdS.**

## 2、The details of the fuel denitration cycle

After the first experiment, the photocatalyst was collected into a centrifuge tube, separated by centrifugation (8000 rpm, 6 min), washed several times with deionised water and ethanol, and then were dried in a vacuum drying oven at 80°C for 6 h. Afterward, the produced yellow-green solids were collected. Then it was the same as the first pyridine removal experiment and the concentration was detected after 4 hours of visible light irradiation (>420nm).

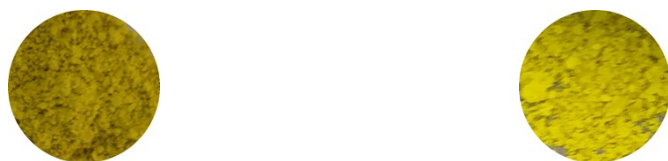

**Fig. S6. (a) Initial 0.65-BMO/CdS, (b) photographs of samples of 0.65-BMO/CdS after four cycles**
